# Supplementary material
Source: ML conference proceedings conference paper supplement (https://openreview.net/forum?id=FefFLN5FvIM)
Supplement: supplementary_material [file attachment]

## 402 Appendix A Implementation Details

### 403 A.1 TactileVAD Implementation and Training Details

---

#### Algorithm 1: TactileVAD Training Algorithm

---

**Input:**  
 $K$ : Number of samples  
 $T$ : Number of timesteps  
 $(\mathbf{u}_0, \mathbf{u}_1, \dots, \mathbf{u}_{T-1})$ : Initial control sequence

```

1  $f_{\text{lat\_dyn}} : \{\mathbf{A}^{(0)}, \mathbf{B}^{(0)}\} \leftarrow \text{Initialization};$ 
2  $f_{\text{dec}} : \{\theta_i^{(0)}\} \leftarrow \text{Initialization};$ 
3  $q : \{\boldsymbol{\mu}_i^{(0)}, \boldsymbol{\Sigma}_i^{(0)}\} \leftarrow \text{Initialization};$ 
4  $k \leftarrow 0;$ 
5 while not converged do
6    $[\mathbf{z}_t] \sim q(\mathbf{z}_t; \boldsymbol{\mu}_t^{(k)}, \boldsymbol{\Sigma}_t^{(k)});$ 
7    $q(\hat{\mathbf{z}}_{t+1}; \hat{\boldsymbol{\mu}}_t^{(k)}, \hat{\boldsymbol{\Sigma}}_t^{(k)}) = \mathcal{N}(\mathbf{A}\boldsymbol{\mu}_t + \mathbf{B}\mathbf{u}_t, \mathbf{A}\boldsymbol{\Sigma}_t\mathbf{A}^\top);$ 
8    $[\hat{\mathbf{z}}_{t+1}] \sim q(\hat{\mathbf{z}}_{t+1}; \hat{\boldsymbol{\mu}}_t^{(k)}, \hat{\boldsymbol{\Sigma}}_t^{(k)});$ 
9    $[\mathbf{x}_t] = [f_{\text{dec}}(\mathbf{z}_{t+1})];$ 
10   $[\hat{\mathbf{x}}_{t+1}] = [f_{\text{dec}}(\hat{\mathbf{z}}_{t+1})];$ 
11   $l_{\text{rec}} = \mathbb{E}_{\mathbf{z}_t \sim q_t} [-\log P_\theta(\mathbf{x}_t | \mathbf{z}_t)];$ 
12   $l_{\text{pred}} = \mathbb{E}_{\hat{\mathbf{z}}_{t+1} \sim \hat{q}_{t+1}} [-\log P_\theta(\mathbf{x}_{t+1} | \hat{\mathbf{z}}_{t+1})];$ 
13   $l_{\text{cons}} = \text{KL}(q(\hat{\mathbf{z}}_{t+1}; \hat{\boldsymbol{\mu}}_t^{(k)}, \hat{\boldsymbol{\Sigma}}_t^{(k)}) \| q(\mathbf{z}_t; \boldsymbol{\mu}_{t+1}^{(k)}, \boldsymbol{\Sigma}_{t+1}^{(k)}));$ 
14   $l_{\text{kl}} = \text{KL}(q(\mathbf{z}_t; \boldsymbol{\mu}_{t+1}^{(k)}, \boldsymbol{\Sigma}_{t+1}^{(k)}) \| P(Z));$ 
15   $l = \alpha_{\text{rec}} l_{\text{rec}} + \alpha_{\text{pred}} l_{\text{pred}} + \alpha_{\text{cons}} l_{\text{cons}} + \alpha_{\text{kl}} l_{\text{kl}};$ 
16   $\{\theta, \mathbf{A}, \mathbf{B}, \boldsymbol{\mu}_t, \boldsymbol{\Sigma}_t, \boldsymbol{\mu}_{t+1}, \boldsymbol{\Sigma}_{t+1}\}^{(k+1)} \leftarrow \underset{\theta, \mathbf{A}, \mathbf{B}, \boldsymbol{\mu}_t, \boldsymbol{\Sigma}_t, \boldsymbol{\mu}_{t+1}, \boldsymbol{\Sigma}_{t+1}}{\text{grad\_step}}(l);$ 
17   $k \leftarrow k + 1;$ 

```

---

### 404 A.2 TactileVAD Control Details

---

#### Algorithm 2: TactileVAD Control Algorithm

---

**Input:**  
 $\mathbf{x}_g$ : Goal observation representing  $\mathbf{s}_g$   
 $\mathbf{Q}$ : quadratic state cost  
 $\mathbf{R}$ : quadratic action cost  
 $n$ : number of inference iterations

```

1  $\mathbf{K} \leftarrow \text{LQRSolution}(\mathbf{Q}, \mathbf{R});$ 
2  $\mathbf{z}_g \leftarrow \text{inference}_{f_{\text{dec}}}(\mathbf{x}_g);$ 
3 while not converged do
4    $\mathbf{x}_t \leftarrow \text{get\_observation}();$ 
5    $\mathbf{z}_t \leftarrow \text{inference}_{f_{\text{dec}}}(\mathbf{x}_t);$ 
6    $\mathbf{u}_t \leftarrow -\mathbf{K}(\mathbf{z}_t - \mathbf{z}_g);$ 
7    $\text{send\_to\_actuator}(\mathbf{u}_t);$ 
8    $k \leftarrow k + 1;$ 

```

---

## 405 Appendix B Experimental Details

### 406 B.1 Baselines Details

407 All four benchmarked models share the same decoder architectures and latent dynamics parametrization.  
 408 Encoder-decoder approaches (AE and E2C) share the encoder structure but E2C extends it to produce both

| Method     | Bubbles Final Imprint Errors ( $\cdot 10^{-6}$ ) |               |               |               |               |             | Gelslim Final Imprint Errors |               |              |             |              |             |
|------------|--------------------------------------------------|---------------|---------------|---------------|---------------|-------------|------------------------------|---------------|--------------|-------------|--------------|-------------|
|            | 20mm Rod (Train)                                 |               | 15mm Rod      |               | 30mm Rod      |             | 20mm Rod (Train)             |               | 15mm Rod     |             | 30mm Rod     |             |
|            | Mean ↓                                           | Std ↓         | Mean ↓        | Std ↓         | Mean ↓        | Std ↓       | Mean ↓                       | Std ↓         | Mean ↓       | Std ↓       | Mean ↓       | Std ↓       |
| AE         | 8.6062                                           | 4.3312        | 2.3818        | 2.1589        | 15.269        | 12.121      | 30.009                       | 9.90          | 27.22        | 4.17        | 18.84        | 8.319       |
| E2C        | 5.9678                                           | 5.2829        | 4.4046        | 4.6345        | 3.9464        | 2.0997      | 25.28                        | 7.576         | 29.20        | 7.27        | 19.05        | 5.79        |
| AD         | 6.5889                                           | 3.4163        | 3.3810        | 1.9211        | 11.281        | 3.8071      | 21.076                       | 3.75          | 29.24        | 11.45       | 15.98        | 1.51        |
| VAD (ours) | <b>2.3723</b>                                    | <b>1.0926</b> | <b>0.6295</b> | <b>0.2842</b> | <b>3.1057</b> | <b>2.67</b> | <b>19.631</b>                | <b>12.252</b> | <b>23.91</b> | <b>9.44</b> | <b>14.52</b> | <b>6.34</b> |

Table 4: Tactile Rod Grasping Evaluation: (Tactile similarity)

409  $\mu$  and  $\text{diag}(\Sigma)$ . Fig. B.1 shows the schematic for E2C over trajectories. Fig. B.2 shows the auto-decoder  
410 architecture.

## 411 B.2 Moving Block Control Details

412 The moving block task is defined by  $20 \times 20$  grid that contains a  $3 \times 12$  block. The sensed area is  $12 \times 8$   
413 and is centered in the middle of the space. The true block state is defined by the block top corner coordinates  
414  $(x, y)$ . The block motion is defined by limited on a box of size  $u = (\delta x, \delta y) \in \mathcal{U} \subseteq [-3, 3] \times [-3, 3]$ . States  
415 are encoded as binary masks. The pose error is computed as the Manhattan distance. The models were trained  
416 on 500 random trajectories of length 20 steps. The reconstruction and prediction loss over observations is  
417 computed as the BCE against the ground truth states.

## 418 B.3 Tactile Rod Grasping Details

419 The rod grasping task is defined over a  $SE(2)$  space of robot-rod configurations. The space limits are  $\mathcal{S} \subseteq$   
420  $[-20, 20] \times [-20, 50] \times [-\frac{\pi}{2}, \frac{\pi}{2}]$ . Robot action are constrained within a box defined as:

$$\mathbf{u} = (\delta x, \delta y, \delta \theta) \in \mathcal{U} \subseteq [-6, 6] \times [-5, 5] \times [-0.09\pi, 0.09\pi]$$

421 For the bubbles sensors, states are encoded as deformation depthmaps of size  $(2, 25, 20)$ . Gelslim data is  
422 encoded as color differences encoded as grayscale of size  $(2, 20, 20)$

$$\text{Pose Score}\left(\begin{bmatrix} x_1 \\ y_1 \\ \theta_1 \end{bmatrix}, \begin{bmatrix} x_2 \\ y_2 \\ \theta_2 \end{bmatrix}\right) = \text{MSE}(x_1, x_2) + \text{MSE}(y_1, y_2) + r_g \text{MSE}(\theta_1, \theta_2) \quad (5)$$

423 where  $r_g$  is the radius of gyration of the rod.

## 424 Appendix C Additional Experiment Results

### 425 C.1 Tactile Rod Grasping

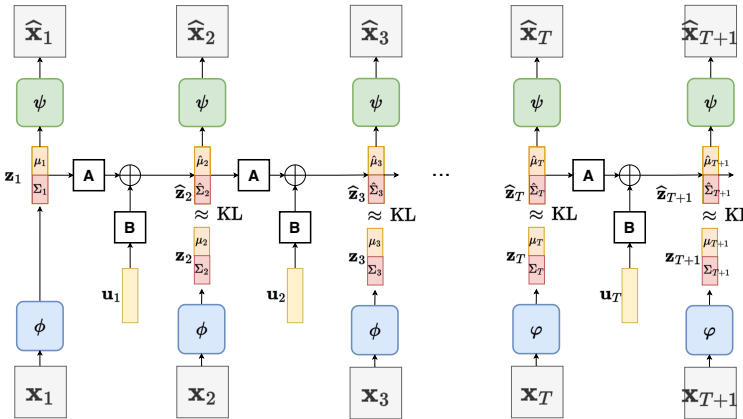

Figure B.1: E2C Model

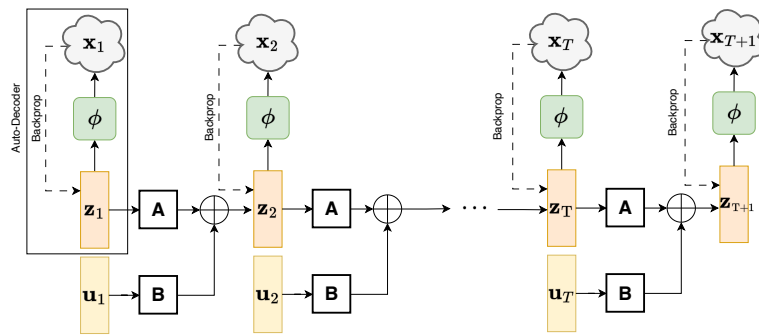

Figure B.2: Auto-Decoder Latent Linear Dynamics Model (AD)
